# Supplementary material for: Identification and expression analysis of two steamer-like retrotransposons in the Chilean blue mussel (Mytilus chilensis)
Source: PubMed Central journal article supplement (PMC11046912; doi:10.1186/s40659-024-00498-x), 2024-04-26
Supplement: 40659_2024_498_MOESM1_ESM.pdf [file 40659_2024_498_MOESM1_ESM.pdf]

CLUSTAL O(1.2.4) multiple sequence alignment

|                       |                                                                         |           |
|-----------------------|-------------------------------------------------------------------------|-----------|
| MchSLE1<br>KX018543.1 | tgtaacatgtatagatgtcagtactttgataatgcacgtgtaataactcatgcgactg<br>-----     | 60<br>0   |
| MchSLE1<br>KX018543.1 | gcacttccaccaactgtgttacacatgttattcttgtaacaatgtagactaacatgc<br>-----      | 120<br>0  |
| MchSLE1<br>KX018543.1 | tgatatattaacgtagttcactataacttggttctctcttaatggtatactatgggatat<br>-----   | 180<br>0  |
| MchSLE1<br>KX018543.1 | aaacatgggtgtcagatgttaaaacccgatgtcagacaacgaggaaaaacgaaaacataaat<br>----- | 240<br>0  |
| MchSLE1<br>KX018543.1 | gagccggaagaagatcatccagaggaacaagcgatagaaccacaagcagaactagcg<br>-----      | 300<br>0  |
| MchSLE1<br>KX018543.1 | attgaaatggcagccgtcccaccattgtttaacattccattcccgggaaactggacttg<br>-----    | 360<br>0  |
| MchSLE1<br>KX018543.1 | gatggaaatataatcaacaaaactggaaaaattcaagcggacatgggacaattatgaaatc<br>-----  | 420<br>0  |
| MchSLE1<br>KX018543.1 | gcatcaggtttatctacaaaagatacaaaaactacgtactgcaacattgcttacttgatt<br>-----   | 480<br>0  |
| MchSLE1<br>KX018543.1 | ggcccagaagcaatggatatttttgatggactagctttcgaaaatgaagaagacaagaag<br>-----   | 540<br>0  |
| MchSLE1<br>KX018543.1 | gacatagcaaaaagtgatcgaaaagtttgaagcgttttgatataggcaaaacaaacgaaaca<br>----- | 600<br>0  |
| MchSLE1<br>KX018543.1 | tttgaaagatacactttcaacatatgtaatcaaagcgaagccgaaaacatcgacacttac<br>-----   | 660<br>0  |
| MchSLE1<br>KX018543.1 | gtctcaaagctaagaaaacttgcaaaaacatgcaactaccaggatttaataagaaagcctc<br>-----  | 720<br>0  |
| MchSLE1<br>KX018543.1 | atccgtgatagaattgtctgtggaatacgggacaacacggcaagaaaagacttttgcaa<br>-----    | 780<br>0  |
| MchSLE1<br>KX018543.1 | gaagacaaattgactttgaataagtgcatagatatttgccgtgctttagaatctacttca<br>-----   | 840<br>0  |
| MchSLE1<br>KX018543.1 | gcaaaaatgaaaaccatgacagggatcctaacaacttggataaaggagaagacattaag<br>-----    | 900<br>0  |
| MchSLE1<br>KX018543.1 | gcggtagaagtaaatcatcttttaacaagcataaaaacatttacacaaaagcaaagcaaa<br>-----   | 960<br>0  |
| MchSLE1<br>KX018543.1 | agaaactgttctactgtggaaaacaatgcactaaaggaaaatgtcctgcatatggaaaa<br>-----    | 1020<br>0 |

|                       |                                                                         |           |
|-----------------------|-------------------------------------------------------------------------|-----------|
| MchSLE1<br>KX018543.1 | aagtgcgacagttgctgcaaaactaaatcatttcgcttcccaatgcagacaaaaatgaaa<br>-----   | 1080<br>0 |
| MchSLE1<br>KX018543.1 | cctagaggtaaagatcagatgtaaggcaatttaacacattatcaacagacgagagcgat<br>-----    | 1140<br>0 |
| MchSLE1<br>KX018543.1 | agcgaatatgaaataatggctgtagaacagacgatgtaaacgtaaacatgatacagaat<br>-----    | 1200<br>0 |
| MchSLE1<br>KX018543.1 | aagatatttgcaaggatgctattaatagatgagaacaagagggttaagtttcaattagat<br>-----   | 1260<br>0 |
| MchSLE1<br>KX018543.1 | agcgggtgcgactgctaacctaattccgagatcttatctcattcattcaciaattgagagt<br>-----  | 1320<br>0 |
| MchSLE1<br>KX018543.1 | ggaaatgacaagttaacgatgtataatcagctactatgaaatcgatggcacatgcatg<br>-----     | 1380<br>0 |
| MchSLE1<br>KX018543.1 | ctgcgtgtaaagaatccaaaaacacacaaacggttacaagggtcaagtttattgttggat<br>-----   | 1440<br>0 |
| MchSLE1<br>KX018543.1 | gataaatacacacctctactagaggcaaaaggccattcaagctatgaaatctaattaagata<br>----- | 1500<br>0 |
| MchSLE1<br>KX018543.1 | caatttcaaacattatggatgcgataaccagaatgcaacaggcattgctctatggaa<br>-----      | 1560<br>0 |
| MchSLE1<br>KX018543.1 | agcattatttctgaatactctgacgtatttgaggagaaggaaacatttaaggggagcctta<br>-----  | 1620<br>0 |
| MchSLE1<br>KX018543.1 | aaattagaaattgatgagtcacatacctcctgttaagtctccgttaagacgcatacctatt<br>-----  | 1680<br>0 |
| MchSLE1<br>KX018543.1 | gcacttaagccgaagttaaagacagaacttcaagactggaaaaactaggagttattaaa<br>-----    | 1740<br>0 |
| MchSLE1<br>KX018543.1 | ccagttgatacaccaacagattgggtatccagccttgaattgtcaagaaacctagtggg<br>-----    | 1800<br>0 |
| MchSLE1<br>KX018543.1 | aaaaaagactatgcattgacccaaagccattaaataaagcattaaagcgggtgtcattat<br>-----   | 1860<br>0 |
| MchSLE1<br>KX018543.1 | ccgttgccaattatcgaagatttacttccagaattaagcaaagctaaagtataattccaag<br>-----  | 1920<br>0 |
| MchSLE1<br>KX018543.1 | tgtgatgttaaaaatggattttggcatgtaaacctagcagacgagtcaagctttttaact<br>-----   | 1980<br>0 |
| MchSLE1<br>KX018543.1 | acttttgaaacaccggttcggaagataccggttgacaaagatgccatttggatttcgcct<br>-----   | 2040<br>0 |
| MchSLE1<br>KX018543.1 | gccccgaatatttccaacaatttttgaaaagagaaattgaaaatctaccgggagtccga<br>-----    | 2100<br>0 |



```

                **   **   *   *   *   *   *   *   *   *   *   *   *   *   *   *
MchSLE1      aacggcattatattcaaaaggtgatcgatgtataatacctaaatgcaatgagaaacg---aa   3231
KX018543.1   GATGGACTACTTTACAAAAGCCAACGTATATTCATACCTAAATCACTTCAACGAGAGATG   455
                *   *   *   *   *   *   *   *   *   *   *   *   *   *   *
MchSLE1      atactgagccagattcactactcatattggcattgaaggatgtttaaaacgtgcacgagaa   3291
KX018543.1   TTAGTGAATTTGCACGAAGCACAATCTTGGCATTTGTTAAGACAAAACAGCGTGCCCGTGAA   515
                *   *   *   *   *   *   *   *   *   *   *   *   *   *   *
MchSLE1      tgcgtatactggcctagaatgaattcagaattgagagactacatcagtaaatgcatgtg   3351
KX018543.1   ATACTATCTGGCGTAATATGAACAGTGATATTGAAAACCTCATTAAAAACTGTAGCATA   575
                *   *   *   *   *   *   *   *   *   *   *   *   *   *   *
MchSLE1      tgccagtcacttgctatgaaacaaccgaaagaactttaagtcacacgacgtgccatcg   3411
KX018543.1   TGTAACAAGTTTAGAAAGGCAAACTGTAGAGAACCGCTCAATCTCATGATATTCGCTCG   635
                *   *   *   *   *   *   *   *   *   *   *   *   *   *   *
MchSLE1      agaccgtgggctaagataggaaccgatttattcacactatcgggaaatgactatattgatt   3471
KX018543.1   CGTCCGTGGGCCAAAGTCGGAA-----
                *   *   *   *   *   *   *   *   *
MchSLE1      actgtagattattacagcagttttttcggagtgatagactttatgatacttcgtcaaag   3531
KX018543.1   -----
MchSLE1      acagtaatcaataaaacttaacaacatttcgctagatggggaatccctgaaacagttatc   3591
KX018543.1   -----
MchSLE1      tcagacaatggaccgcaatatttcgctccgaacaatttaaacagttcagcaagcaatgggat   3651
KX018543.1   -----
MchSLE1      tttcaacataaaaacatctagtcgggacatgcacaatctaattgggaaagtcgaaaacgca   3711
KX018543.1   -----
MchSLE1      gtgaaaacagcaaaacgcctaattgcaaaaagcgaaaaaatcaaacagtgaccggtacatt   3771
KX018543.1   -----
MchSLE1      gcgttactgaattttagaaatacaccacaacaagtgacaaaatacagtcgggtacaacaa   3831
KX018543.1   -----
MchSLE1      atgatcaacagaaggacacgaacattgctaccaatgaaatcagcattatgtgaatcgaaa   3891
KX018543.1   -----
MchSLE1      attccagaaaatgtacgaagcaacatcatggataataaaaaacgtcaagaaaaatattac   3951
KX018543.1   -----
MchSLE1      aatagatccgcaagagacttaaacgaacttaacaagggtgaaattgtcagattaacacca   4011
KX018543.1   -----
MchSLE1      caagatcgacaaaaagaatgggaaaaaggagtgatcaagaataaaaaatccgagagatcg   4071
KX018543.1   -----
MchSLE1      tatgaagtcgaaaaggaaaatggacgtaccgtaagacgtaacagaaaatatttgcgtaga   4131
KX018543.1   -----
MchSLE1      actaatgaacaattcaatccgaaatgtcaaacggaagaaattaacattgatccgaatgaa   4191
KX018543.1   -----
MchSLE1      caagagatatctcatgatgaaaacaaaaacaatagttcggaccctaaacattcagtcgtg   4251

```

```

KX018543.1 ----- 657

MchSLE1      cccgatgttgaagagaaatctcaaccgtgtagccgttatggaagaccaattcagaaacca 4311
KX018543.1 ----- 657

MchSLE1      agctggatgaaagattacgatttaaagtgacttttaacggttgaacattgtaaatattag 4371
KX018543.1 ----- 657

MchSLE1      ttagagactagaagttaggtttagttaatttagtatttgaactttaaatgacagtgcctt 4431
KX018543.1 ----- 657

MchSLE1      agaaaattcatttagattctagaacatatacatggacagttaaatatagcagttaaagaa 4491
KX018543.1 ----- 657

MchSLE1      ttttataatgttgcagtaattatgtttagattttctgataatgtgatataagc 4551
KX018543.1 ----- 657

MchSLE1      ttcaagttgaaaaaagaaggatgtaacatgtatagtagtcagtactttgataatgcac 4611
KX018543.1 ----- 657

MchSLE1      gtgtaataactcatgcgcactggcacttccgccaactgtgttacacatgttattcttgt 4671
KX018543.1 ----- 657

MchSLE1      aaacaatgtagactaaccatgctgtatattaacgtagttcactataacttggttctcac 4731
KX018543.1 ----- 657

MchSLE1      ttaatggtatactatgggatataaaca 4758
KX018543.1 ----- 657

```

```

# Percent Identity Matrix - created by Clustal2.1
#
#

```

```

1: MchSLE1      100.00  52.16
2: KX018543.1  52.16  100.00

```

CLUSTAL O(1.2.4) multiple sequence alignment

```

MchSLE2      GCACATATATGCATCTATGAAAATAATAGGCAGAATGAGAAAAGCAACTTAACAAGATTT 60
KX018543.1 ----- 0

MchSLE2      CAATTAGACAGTGGAGCAACATGCAATATAATCACTGCAAGAACATTGAAAGAGCTTGAT 120
KX018543.1 -----TTGAAAGCG----- 9
                      ***** *

MchSLE2      ATTAACCAATTACAGAAAACAAGTCAAATACTGACAATGTACAACAATACCACAATAAAA 180
KX018543.1 ----ACCA----C-----AAACCGTTAGTTGCAATCTACGACAAACCGC----- 45
                      **** * * * * * * * * * *

MchSLE2      CCGATAGGAACATGCATTCTAAAAATTGGTGAATCCAAAGAACAATAAAGTTCAAGGCA 240
KX018543.1 -----TTTATCGAGCTA----- 57
                      * * * * *

MchSLE2      GAATTTGTAGTAGTAAAAGATGGCACTTTGACTCCGTTGTTAGGTAGCAAAGCAGTGCAA 300
KX018543.1 ----- 57

```
